# Supplementary material for: Combining Zeolites with Early-Maturing Annual Legume Cover Crops in Rainfed Orchards: Effects on Yield, Fatty Acid Composition and Polyphenolic Profile of Olives and Olive Oil
Source: MDPI journal article supplement (doi:10.3390/molecules28062545), 2023-03-10
Supplement: s1 [file s1]

# Combining Zeolites with Early-Maturing Annual Legume Cover Crops in Rainfed Orchards: Effects on Yield, Fatty Acid Composition and Polyphenolic Profile of Olives and Olive Oil

Sandra Martins <sup>1</sup>, Ermelinda Silva <sup>1,2</sup>, Cátia Brito <sup>1,3</sup>, Luís Pinto <sup>2</sup>, Carlos Martins-Gomes <sup>1,4</sup>, Alexandre Gonçalves <sup>2</sup>, Margarida Arrobas <sup>5</sup>, Manuel Ângelo Rodrigues <sup>5</sup>, Carlos M. Correia <sup>1,3</sup> and Fernando M. Nunes <sup>4,\*</sup>

<sup>1</sup> CITAB—Centre for the Research and Technology of Agro-Environmental and Biological Sciences, University of Trás-os-Montes and Alto Douro, 5000-801 Vila Real, Portugal

<sup>2</sup> MORE—Collaborative Laboratory Mountains of Research, Brigantia Ecopark, 5300-358 Bragança, Portugal

<sup>3</sup> Inov4Agro—Institute for Innovation, Capacity Building and Sustainability of Agri-Food Production, University of Trás-os-Montes and Alto Douro, 5000-801 Vila Real, Portugal

<sup>4</sup> CQ-VR—Food and Wine Chemistry Laboratory, Chemistry Research Centre—Vila Real, University of Trás-os-Montes e Alto Douro, 5000-801 Vila Real, Portugal

<sup>5</sup> CIMO—Centro de Investigação de Montanha, Instituto Politécnico de Bragança, 5300-253 Bragança, Portugal

\* Correspondence: fnunes@utad.pt

Supplementary Results

**Table S1.** CV-ANOVA respective to the OPLS-DA of olive fruit phenolic compounds.

| M1(Untitled) | SS       | DF | MS       | F       | p            | SD       |
|--------------|----------|----|----------|---------|--------------|----------|
| Total Corr.  | 34       | 34 | 1        |         |              | 1        |
| Regression   | 33.5831  | 18 | 1.86573  | 71.5989 | 6,02805e-012 | 1.36592  |
| Residual     | 0.416928 | 16 | 0.026058 |         |              | 0.161425 |

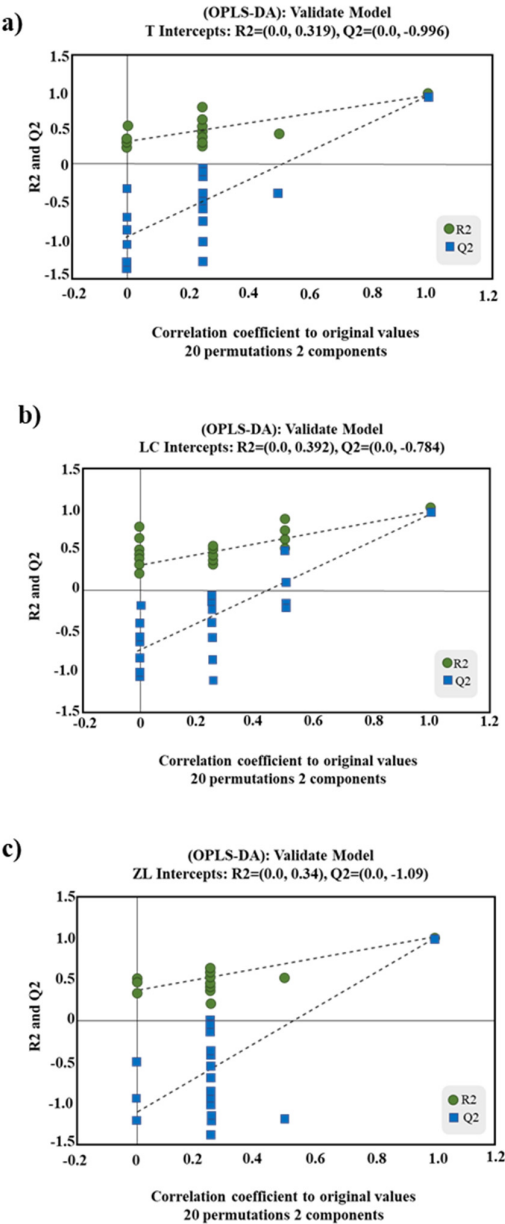

**Figure S1.** Permutation tests of OPLS-DA relative to the olive fruit phenolic compounds according to T (a), LC (b) and ZL (c) treatments.

**Table S2.** CV-ANOVA respective to the OPLS-DA of olive oil phenolic compounds.

| M1(Untitled) | SS      | DF | MS       | F       | p          | SD       |
|--------------|---------|----|----------|---------|------------|----------|
| Total Corr.  | 34      | 34 | 1        |         |            | 1        |
| Regression   | 27.6474 | 18 | 1.53597  | 3.86857 | 0.00453686 | 1.23934  |
| Residual     | 6.3526  | 16 | 0.397038 |         |            | 0.630109 |

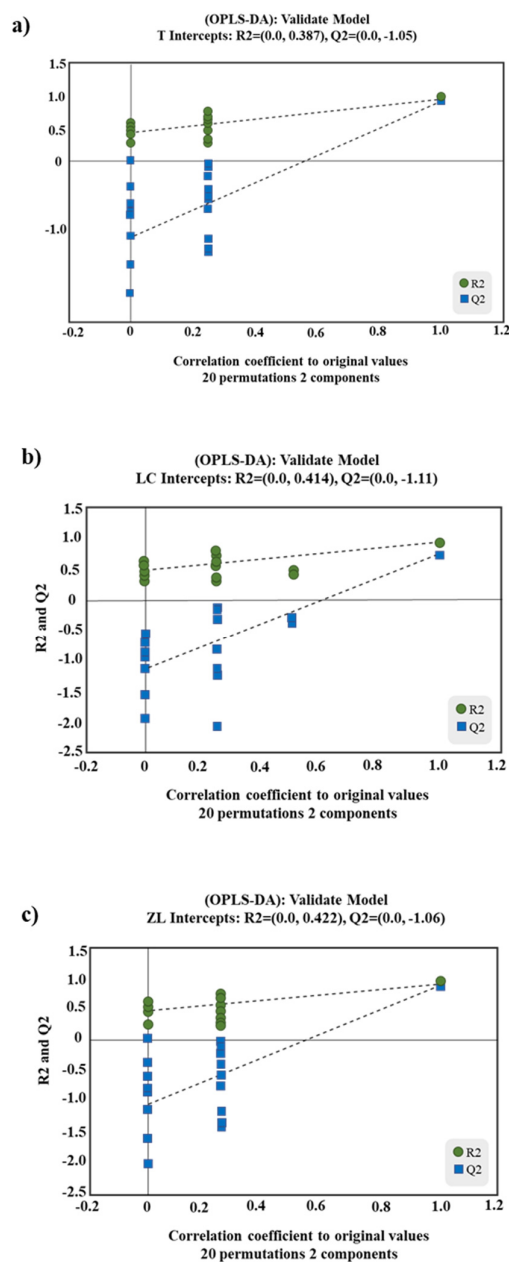

**Figure S2.** Permutation tests of OPLS-DA relative to the olive oil phenolic compounds, according to T **(a)**, LC **(b)** and ZL **(c)** treatments.

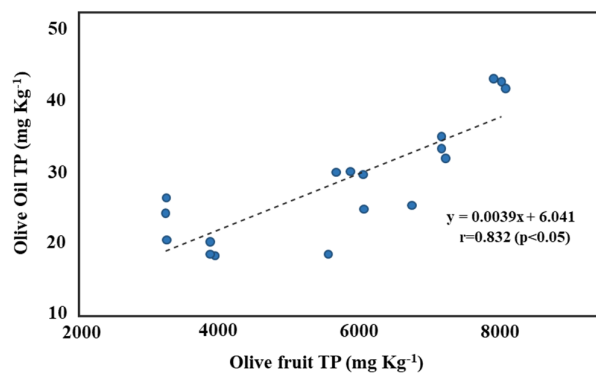

**Figure S3.** Correlation between the olive fruit total phenolic compounds in relation to olive oil phenolic compounds.

**Table S3.** CV-ANOVA respective to the OPLS-DA of olive fruit fatty acids.

| M1(Untitled) | SS      | DF | MS      | F       | p        | SD      |
|--------------|---------|----|---------|---------|----------|---------|
| Total Corr.  | 34      | 34 | 1       |         |          | 1       |
| Regression   | 12.1603 | 8  | 1.52003 | 1.80959 | 0.120777 | 1.2329  |
| Residual     | 21.8397 | 26 | 0.83999 |         |          | 0.91651 |

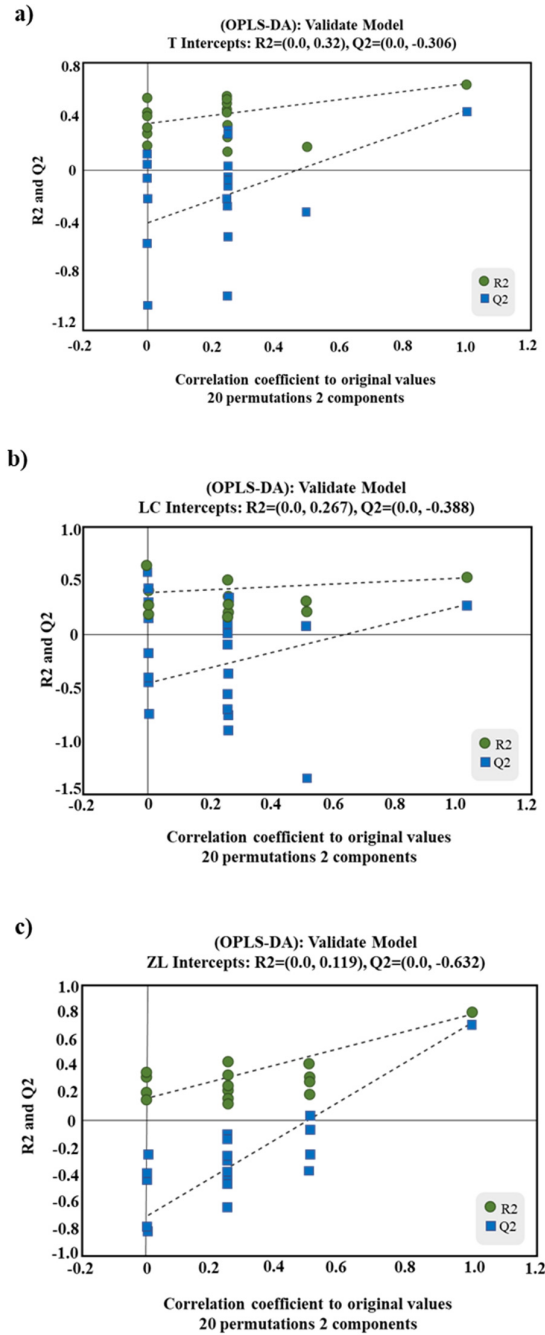

**Figure S4.** Permutation tests of OPLS-DA relative to the olive fruit fatty acids, according to T (a), LC (b) and ZL (c) treatments.
